# Supplementary material for: Establishment of a Cre-loxP System Based on a Leaky LAC4 Promoter and an Unstable panARS Element in Kluyveromyces marxianus
Source: MDPI journal article supplement (doi:10.3390/microorganisms10061240), 2022-06-17
Supplement: s1 [file s1]

Table S1. Strains used in this study

| Name       | Genotype                                                                                                   | Sources    |
|------------|------------------------------------------------------------------------------------------------------------|------------|
| FIM-1      | wild type                                                                                                  | [31]       |
| FIM-1ΔU    | <i>ura3</i> Δ                                                                                              | [31]       |
| αFIM-1ΔU   | <i>MATα</i> , <i>ura3</i> Δ                                                                                | [36]       |
| αFIM-1ΔUΔH | <i>MATα</i> , <i>ura3</i> Δ, <i>his3</i> Δ                                                                 | [36]       |
| LHP719     | <i>MATα</i> , <i>ura3</i> Δ, <i>his3</i> Δ, <i>lac4</i> Δ::P <sub>TEF</sub> -loxP- <i>LAC4</i> -loxP       | This study |
| LHP756     | <i>MATα</i> , <i>ura3</i> Δ, <i>his3</i> Δ, <i>lac4</i> Δ::P <sub>TEF</sub> -loxPsym- <i>LAC4</i> -loxPsym | This study |
| LHP758     | <i>MATα</i> , <i>ura3</i> Δ, <i>his3</i> Δ, <i>lac4</i> Δ::P <sub>TEF</sub> -loxPsym- <i>LAC4</i>          | This study |
| LHP1043    | <i>MATα</i> , <i>ura3</i> Δ, <i>his3</i> Δ, <i>lac4</i> Δ::P <sub>TEF</sub> -loxPsym- <i>LAC4</i> ,        | This study |
| LHP1044    | <i>MATα</i> , <i>ura3</i> Δ, loxpsym(16)*                                                                  | This study |

\* position of 16 loxPsym: Chr I (1451427, 1673871), Chr II (717538, 896924), Chr III (1219332, 326046), Chr IV (1172245, 704908), Chr V (346042, 756338), Chr VI (1069906, 753935), Chr VII (409354, 689479), Chr VIII (610289, 440003)
