# Supplementary material for: Establishment of a Cre-loxP System Based on a Leaky LAC4 Promoter and an Unstable panARS Element in Kluyveromyces marxianus
Source: MDPI journal article supplement (doi:10.3390/microorganisms10061240), 2022-06-17
Supplement: s1 [file s1]

Table S2. Plasmids used in this study

| Name   | Description                                                                                                                | Backbone | application                                                                                                                               | Sources |
|--------|----------------------------------------------------------------------------------------------------------------------------|----------|-------------------------------------------------------------------------------------------------------------------------------------------|---------|
| LHZ881 | KmARS1, <i>HphMX4</i>                                                                                                      | /        | Vector backbone for centromere plasmid                                                                                                    | [38]    |
| LHZ882 | KmARS1, KmCEN5, <i>HphMX4</i>                                                                                              | LHZ881   | Centromere plasmid for verification the function of KmCEN5                                                                                |         |
| LHZ883 | KmARS1, KmCEN1 and flanking sequence, <i>HphMX4</i>                                                                        | LHZ881   | Centromere plasmid for verification the function of KmCEN1 and its flanking sequence                                                      |         |
| LHZ884 | KmARS1, KmCEN2 and flanking sequence, <i>HphMX4</i>                                                                        | LHZ881   | Centromere plasmid for verification the function of KmCEN2 and its flanking sequence                                                      |         |
| LHZ885 | KmARS1, KmCEN3 and flanking sequence, <i>HphMX4</i>                                                                        | LHZ881   | Centromere plasmid for verification the function of KmCEN3 and its flanking sequence                                                      |         |
| LHZ886 | KmARS1, KmCEN4 and flanking sequence, <i>HphMX4</i>                                                                        | LHZ881   | Centromere plasmid for verification the function of KmCEN4 and its flanking sequence                                                      |         |
| LHZ887 | KmARS1, KmCEN5 and flanking sequence, <i>HphMX4</i>                                                                        | LHZ881   | Centromere plasmid for verification the function of KmCEN5 and its flanking sequence                                                      |         |
| LHZ888 | KmARS1, KmCEN6 and flanking sequence, <i>HphMX4</i>                                                                        | LHZ881   | Centromere plasmid for verification the function of KmCEN6 and its flanking sequence                                                      |         |
| LHZ889 | KmARS1, KmCEN7 and flanking sequence, <i>HphMX4</i>                                                                        | LHZ881   | Centromere plasmid for verification the function of KmCEN7 and its flanking sequence                                                      |         |
| LHZ890 | KmARS1, KmCEN8 and flanking sequence, <i>HphMX4</i>                                                                        | LHZ881   | Centromere plasmid for verification the function of KmCEN8 and its flanking sequence                                                      |         |
| LHZ620 | KmARS1, KmCEN5, PLAC4-Cre, <i>KanMX6</i>                                                                                   | /        | /                                                                                                                                         | [34]    |
| LHZ892 | KmARS1, Cre, <i>KanMX6</i>                                                                                                 | LHZ620   | Cre plasmid mediated by ARS1                                                                                                              |         |
| LHZ893 | panARS, Cre, <i>KanMX6</i>                                                                                                 | LHZ620   | Cre plasmid mediated by panARS                                                                                                            |         |
| LHZ531 | ARS1, Cas9, gRNA, <i>URA3</i>                                                                                              | /        | CRISPR vector                                                                                                                             | [37]    |
| LHZ891 | gRNA-RHY101F/RHY101R                                                                                                       | LHZ531   | CRISPR plasmid for the deletion of <i>LAC4</i> and its promoter                                                                           |         |
| LHZ894 | <i>LAC4</i> upstream sequence- <i>TEF</i> promoter -loxP- <i>LAC4</i> -loxP sequence- <i>LAC4</i> downstream sequence      | PMD18-T  | Providing donor sequence to replace <i>LAC4</i> and its promoter with a cassette of <i>TEF</i> promoter -loxP- <i>LAC4</i> -loxP          |         |
| LHZ895 | <i>LAC4</i> upstream sequence- <i>TEF</i> promoter-loxPsym- <i>LAC4</i> -loxPsym sequence- <i>LAC4</i> downstream sequence | PMD18-T  | Providing donor sequence to replace <i>LAC4</i> and its promoter with a cassette of <i>TEF</i> promoter and loxPsym- <i>LAC4</i> -loxPsym |         |
| LHZ896 | <i>LAC4</i> upstream sequence- <i>TEF</i> promoter-loxPsym- <i>LAC4</i> - <i>LAC4</i> downstream sequence                  | PMD18-T  | Providing donor sequence to replace <i>LAC4</i> and its promoter with a cassette of <i>TEF</i> promoter and loxPsym- <i>LAC4</i>          |         |
| LHZ897 | gRNA-RHY102F/RHY102R                                                                                                       | LHZ531   | CRISPR plasmid for insertion of loxPsym site at Chr I (747278bp)                                                                          |         |
| LHZ898 | gRNA-RHY103F/RHY103R                                                                                                       | LHZ531   | CRISPR plasmid for the insertion of loxPsym site at Chr VIII (440003)                                                                     |         |
| LHZ899 | gRNA-RHY104F/RHY104R                                                                                                       | LHZ531   | CRISPR plasmid for the insertion of loxPsym site at Chr VII (409354)                                                                      |         |
| LHZ900 | gRNA-RHY105F/RHY105R                                                                                                       | LHZ531   | CRISPR plasmid for the insertion of loxPsym site at Chr I (1673871)                                                                       |         |
| LHZ901 | gRNA-RHY106F/RHY106R                                                                                                       | LHZ531   | CRISPR plasmid for the insertion of loxPsym site at Chr II (896924)                                                                       |         |
| LHZ902 | gRNA-RHY107F/RHY107R                                                                                                       | LHZ531   | CRISPR plasmid for the insertion of loxPsym site at Chr I (1451427)                                                                       |         |
| LHZ903 | gRNA-RHY108F/RHY108R                                                                                                       | LHZ531   | CRISPR plasmid for the insertion of loxPsym site at Chr III (326046)                                                                      |         |
| LHZ904 | gRNA-RHY109F/RHY109R                                                                                                       | LHZ531   | CRISPR plasmid for the insertion of loxPsym site at Chr IV (704908)                                                                       |         |
| LHZ905 | gRNA-RHY110F/RHY110R                                                                                                       | LHZ531   | CRISPR plasmid for the insertion of loxPsym site at Chr V (346042)                                                                        |         |
| LHZ906 | gRNA-RHY111F/RHY111R                                                                                                       | LHZ531   | CRISPR plasmid for the insertion of loxPsym site at Chr VI (1069906)                                                                      |         |
| LHZ907 | gRNA-RHY112F/RHY112R                                                                                                       | LHZ531   | CRISPR plasmid for the insertion of loxPsym site at Chr III (1219332)                                                                     |         |
| LHZ908 | gRNA-RHY113F/RHY113R                                                                                                       | LHZ531   | CRISPR plasmid for the insertion of loxPsym site at Chr IV (1172245)                                                                      |         |
| LHZ909 | gRNA-RHY114F/RHY114R                                                                                                       | LHZ531   | CRISPR plasmid for the insertion of loxPsym site at Chr V (756338)                                                                        |         |
| LHZ910 | gRNA-RHY115F/RHY115R                                                                                                       | LHZ531   | CRISPR plasmid for the insertion of loxPsym site at Chr VI (753935)                                                                       |         |
| LHZ911 | gRNA-RHY116F/RHY116R                                                                                                       | LHZ531   | CRISPR plasmid for the insertion of loxPsym site at Chr VII (689479)                                                                      |         |
| LHZ912 | gRNA-RHY117F/RHY117R                                                                                                       | LHZ531   | CRISPR plasmid for the insertion of loxPsym site at Chr II (717538)                                                                       |         |
| LHZ913 | gRNA-RHY118F/RHY118R                                                                                                       | LHZ531   | CRISPR plasmid for the insertion of loxPsym site at Chr VIII (610289)                                                                     |         |
