# Supplementary material for: Establishment of a Cre-loxP System Based on a Leaky LAC4 Promoter and an Unstable panARS Element in Kluyveromyces marxianus
Source: MDPI journal article supplement (doi:10.3390/microorganisms10061240), 2022-06-17
Supplement: s1 [file s1]

Table S3. Primers used in this study

| Name          | Sequence(5'-3')                                                                                           | Description                                                                                                                                                                                             | Alias |
|---------------|-----------------------------------------------------------------------------------------------------------|---------------------------------------------------------------------------------------------------------------------------------------------------------------------------------------------------------|-------|
| HphMX4-F      | CATCACATCCGAACATAAACACCATGGGTAA<br>AAGCCTGAAGCTACCCGCGACG                                                 | Forward primer PCR for amplifying HphMX4 from pCloneHyg1, and then replace the KANMX6 of pFA6a-13Myc-KANMX6 by HphMX4 to obtain pFA6a-13Myc-HphMX4                                                      |       |
| HphMX4-R      | CTTTTATTGTCCAGTACTGATTATTCCTTTGCC<br>TCGGACGAGTGCTGGGG                                                    | Reverse primer PCR for amplifying HphMX4 from pCloneHyg1, and then replace the KANMX6 of pFA6a-13Myc-KANMX6 by HphMX4 to obtain pFA6a-13Myc-HphMX4                                                      |       |
| KmARS1-F      | GAACGCGGCCGCGAGCTGAAGCTTATCGATTGA<br>AGTTTGTCCAACTATCCACTATG                                              | Forward primer PCR for amplifying KmARS1 from genomic DNA of FIM-1, and ligating with ADH1 by overlap extension PCR, then inserting into Sma I and Hind III site of pFA6a-13Myc-HphMX4 to obtain LHZ881 |       |
| KmARS1-R      | CTATTTCATTACCATCATTTCTTCGTCGACCCG<br>CGGTTTTAACGATATATCATTTTCAA                                           | Reverse primer PCR for amplifying KmARS1 from genomic DNA of FIM-1, and ligating with ADH1 by overlap extension PCR, then inserting into Sma I and Hind III site of pFA6a-13Myc-HphMX4 to obtain LHZ881 |       |
| ADH1-F        | TTGAAATGATATATCGTTAAACCGCGGGTCG<br>ACGAAGAAATGATGGTAAATGAAATAG                                            | Forward primer PCR for amplifying ADH1 from genomic DNA of S288C, and ligating with KmARS1 by overlap extension PCR, then inserting into Sma I and Hind III site of pFA6a-13Myc-KANMX6 to obtain LHZ881 |       |
| ADH1-R        | GCCTCGAGTACCGGTACCGCTACCCGGGAGTTG<br>ATTGTATGCTTGGTATAGCTTG                                               | Reverse primer PCR for amplifying ADH1 from genomic DNA of S288C, and ligating with KmARS1 by overlap extension PCR, then inserting into Sma I and Hind III site of pFA6a-13Myc-KANMX6 to obtain LHZ881 |       |
| cen5-F        | TAAATTGAAATGATATATCGTTAAACCGCGG<br>GTCACGTGTATACAAATTATTAATTTTAAAC                                        | Forward primer PCR for amplifying KmCEN5 from genomic DNA of FIM-1, and then inserting into Sal I site of LHZ881 vector to obtain LHZ882                                                                |       |
| cen5-R        | CATTACCATCATTTCTTCGTCGACGGATCTAT<br>TTACTTTTCGGAACAACCTTTTAAAC                                            | Reverse primer PCR for amplifying KmCEN5 from genomic DNA of FIM-1, and then inserting into Sal I site of LHZ881 vector to obtain LHZ882                                                                |       |
| FS-cen1-F     | AAAATGATATATCGTTAAAAATAATAAAATATA<br>ATTTTACATAGTATAACTCTAAAC                                             | Forward primer PCR for amplifying KmCEN1 and flanking sequence from genomic DNA of FIM-1, and then inserting into Sal I site of LHZ881 vector                                                           |       |
| FS-cen1-R     | CATTACCATCATTTCTTCGTCGACTTTAATGAT<br>TAATTGTTACATTTGGTATAAG                                               | Reverse primer PCR for amplifying KmCEN1 and flanking sequence from genomic DNA of FIM-1, and then inserting into Sal I site of LHZ881 vector                                                           |       |
| FS-cen2-F     | TGAAATGATATATCGTTAAAAATAAGAGAAAT<br>AAAGTTTTTATATAAAGAATAAAAG                                             | Forward primer PCR for amplifying KmCEN2 and flanking sequence from genomic DNA of FIM-1, and then inserting into Sal I site of LHZ881 vector                                                           |       |
| FS-cen2-R     | ATTTCAATTACCATCATTTCTTCCTTAATAACTC<br>TTATAAATGATATAATTTTGTTTA                                            | Reverse primer PCR for amplifying KmCEN2 and flanking sequence from genomic DNA of FIM-1, and then inserting into Sal I site of LHZ881 vector                                                           |       |
| FS-cen3-F     | AATTGAAATGATATATCGTTAAATTCGTTAC<br>ATAACAACACGCTTTTATAAAC                                                 | Forward primer PCR for amplifying KmCEN3 and flanking sequence from genomic DNA of FIM-1, and then inserting into Sal I site of LHZ881 vector                                                           |       |
| FS-cen3-R     | ATTTACCATCATTTCTTCGTCGACAATAAACAA<br>AATAAAATAAAATAAAATAAAAT                                              | Reverse primer PCR for amplifying KmCEN3 and flanking sequence from genomic DNA of FIM-1, and then inserting into Sal I site of LHZ881 vector                                                           |       |
| FS-cen4-F     | AATTGAAATGATATATCGTTAAATTCGTTAT<br>TCTTTATCTTTGCAATTAAC                                                   | Forward primer PCR for amplifying KmCEN4 and flanking sequence from genomic DNA of FIM-1, and then inserting into Sal I site of LHZ881 vector                                                           |       |
| FS-cen4-R     | ATTTCAATTACCATCATTTCTTCAAAAATAAAT<br>AAAATAAAATAAAATAAAATAAAT                                             | Reverse primer PCR for amplifying KmCEN4 and flanking sequence from genomic DNA of FIM-1, and then inserting into Sal I site of LHZ881 vector                                                           |       |
| FS-cen5-F     | TTGAAATGATATATCGTTAAAGTCAACCGCA<br>ACACCACCTATTCTAAGAGGAGAG                                               | Forward primer PCR for amplifying KmCEN5 and flanking sequence from genomic DNA of FIM-1, and then inserting into Sal I site of LHZ881 vector                                                           |       |
| FS-cen5-R     | TATTTCAATTACCATCATTTCTTCGTCGACGAGC<br>TCCTTTCAATTCTGATAAAGTAAGG                                           | Reverse primer PCR for amplifying KmCEN5 and flanking sequence from genomic DNA of FIM-1, and then inserting into Sal I site of LHZ881 vector                                                           |       |
| FS-cen6-F     | AATTGAAATGATATATCGTTAAATAGTGTGT<br>GGAACCTATAATTAATACTTG                                                  | Forward primer PCR for amplifying KmCEN6 and flanking sequence from genomic DNA of FIM-1, and then inserting into Sal I site of LHZ881 vector                                                           |       |
| FS-cen6-R     | CATTACCATCATTTCTTCGTCGACATCTAAATA<br>AATATAGGATGCAAAAGC                                                   | Reverse primer PCR for amplifying KmCEN6 and flanking sequence from genomic DNA of FIM-1, and then inserting into Sal I site of LHZ881 vector                                                           |       |
| FS-CEN7-F     | AATTGAAATGATATATCGTTAAACTCTACCC<br>TTTTCAATCCAAAAGT                                                       | Forward primer PCR for amplifying KmCEN7 and flanking sequence from genomic DNA of FIM-1, and then inserting into Sal I site of LHZ881 vector                                                           |       |
| FS-CEN7-R     | CTATTTCATTACCATCATTTCTTCAATTAAGTT<br>AAAACGCCATAAAATATG                                                   | Reverse primer PCR for amplifying KmCEN7 and flanking sequence from genomic DNA of FIM-1, and then inserting into Sal I site of LHZ881 vector                                                           |       |
| FS-cen8-F     | ATTGAAATGATATATCGTTAAAAAATATTA<br>AGCATTGAAATAAATAAATAACAAT                                               | Forward primer PCR for amplifying KmCEN8 and flanking sequence from genomic DNA of FIM-1, and then inserting into Sal I site of LHZ881 vector                                                           |       |
| FS-cen8-R     | CTATTTCATTACCATCATTTCTTCAATTTTCCA<br>AAAAAATGTCTATAAATCG                                                  | Reverse primer PCR for amplifying KmCEN8 and flanking sequence from genomic DNA of FIM-1, and then inserting into Sal I site of LHZ881 vector                                                           |       |
| ARS1-F        | GAACGCGGCCGCGAGCTGAAGCTTATCGATTGA<br>AGTTTGTCCAACTATC                                                     | Forward primer PCR for amplifying KmARS1 from LHZ881, and then inserting into Pvu II and Sal I sites of LHP620                                                                                          |       |
| ARS1-R        | CTACCTGGCCTGGATGGCTGTGACGGATCCTT<br>TTAACGATATATCATTTTC                                                   | Reverse primer PCR for amplifying KmARS1 from LHZ881, and then inserting into Pvu II and Sal I sites of LHP620                                                                                          |       |
| panARS-F      | GAACGCGGCCGCGAGCTGAAGCTTTCAACATCT<br>TTGGATAATATGCAAGTAG                                                  | Forward primer PCR for amplifying panARS from the genomic DNA of ATCC8585, and then inserting into Pvu II and Sal I sites of LHP620                                                                     |       |
| panARS-R      | CTACCTGGCCTGGATGGCTGTGACTAGTGCTG<br>ATTATGATTGACGTTTATATAC                                                | Reverse primer PCR for amplifying panARS from the genomic DNA of ATCC8585, and then inserting into Pvu II and Sal I sites of LHP620                                                                     |       |
| YY402F        | TTGTGCTACACCGTCTCACTACTTG                                                                                 | PCR for identifying the LAC4 gene                                                                                                                                                                       |       |
| YY551F        | TTGCTAACAAAATAAACTTGAACACG                                                                                | PCR for identifying the inversion of LAC4 gene                                                                                                                                                          |       |
| YY590R        | CATTATCGCATAAGACAATCGGCAC                                                                                 | PCR for identifying the deletion of LAC4 gene                                                                                                                                                           |       |
| YY558R        | TCAAGAGGTGCGTCAAAACAACGC                                                                                  | PCR for identifying the LAC4 gene                                                                                                                                                                       |       |
| RHY101F       | TCA CTAAGTGAAGTCGAGTGTGA                                                                                  | gRNA for LHZ891 CRISPR plasmid                                                                                                                                                                          |       |
| RHY101R       | AAC TCACACTCGACTTCAAGTAG                                                                                  | gRNA for LHZ891 CRISPR plasmid                                                                                                                                                                          |       |
| RHY102F       | TCA GATAGAATAT TTGGTAGTAG                                                                                 | gRNA for LHZ897 CRISPR plasmid                                                                                                                                                                          |       |
| RHY102R       | AAC CTACTACCAA ATATTCTATC                                                                                 | gRNA for LHZ897 CRISPR plasmid                                                                                                                                                                          |       |
| RHY102-up-F   | GAATGAAACACACAATCTCCCTCC                                                                                  | PCR for amplifying the upstream sequence of Chr I (747278bp)                                                                                                                                            | F1    |
| RHY102-up-R   | GAAAGTGCTCTACTCTGCTCTTAATACACCATA<br>ACTTCGTATAATGTACATTATACGAAGTTATACT<br>ACTACCAATATTCTATCAAAATCACTAAGG | PCR for amplifying the upstream sequence of Chr I (747278bp)                                                                                                                                            |       |
| RHY102-down-F | GGTGTTAATAGAGCAGAGTAGAGCACTTTC                                                                            | PCR for amplifying the downstream sequence of Chr I (747278bp)                                                                                                                                          |       |
| RHY102-down-R | CTGACAACCTCTTCCTTTACGCCTC                                                                                 | PCR for amplifying the downstream sequence of Chr I (747278bp)                                                                                                                                          | R1    |
| RHY103F       | TCACATTGCTATGGAATGCAGCT                                                                                   | gRNA for LHZ898 CRISPR plasmid                                                                                                                                                                          |       |
| RHY103R       | AACAGCTGCATTCCATAGCAATG                                                                                   | gRNA for LHZ898 CRISPR plasmid                                                                                                                                                                          |       |
| RHY103-up-F   | ATGCTATGGTCAAGAAGAGAAAAAGC                                                                                | PCR for amplifying the upstream sequence of Chr VIII (440003)                                                                                                                                           | 15-F  |

|               |                                                                                                      |                                                                 |      |
|---------------|------------------------------------------------------------------------------------------------------|-----------------------------------------------------------------|------|
| RHY103-up-R   | TCATTGCTATGGAATGCAGCTTGATAACTTCGT<br>ATAATGTACATTATACGAAGTTATGTGTTTATGT<br>AATATTTCTAAATATGTAATAAAAG | PCR for amplifying the upstream sequence of Chr VIII (440003)   |      |
| RHY103-down-F | CAAGCTGCATTCCATAGCAATGA                                                                              | PCR for amplifying the downstream sequence of Chr VIII (440003) |      |
| RHY103-down-R | TACCTCCAACCTCCTGAAAAGGACAC                                                                           | PCR for amplifying the downstream sequence of Chr VIII (440003) | 15-R |
| RHY104F       | TCAGAATTGAATTTAACGAACCT                                                                              | gRNA for LHZ899 CRISPR plasmid                                  |      |
| RHY104R       | AACAGGTTTCGTTAAATTCAATTC                                                                             | gRNA for LHZ899 CRISPR plasmid                                  |      |
| RHY104-up-F   | CAACCACAATCTACCGTTTCATCTG                                                                            | PCR for amplifying the upstream sequence of Chr VII (409354)    | 3-F  |
| RHY104-up-R   | ATAAAAATGTCATAAATGGCTCTCCATAACTTC<br>GTATAATGTACATTATACGAAGTTATGAGGTTT<br>GTAAATCAATTTCGATTAAAC      | PCR for amplifying the upstream sequence of Chr VII (409354)    |      |
| RHY104-down-F | GGAGAGCCATTATGACATTTTAT                                                                              | PCR for amplifying the downstream sequence of Chr VII (409354)  |      |
| RHY104-down-R | TTTCCGTTCTATTTTCGTTTATTTT                                                                            | PCR for amplifying the downstream sequence of Chr VII (409354)  | 3-R  |
| RHY105F       | TCAATAATGGGACACATAAGCGA                                                                              | gRNA for LHZ900 CRISPR plasmid                                  |      |
| RHY105R       | AACTCGCTTATGTGTCCCATTAT                                                                              | gRNA for LHZ900 CRISPR plasmid                                  |      |
| RHY105-up-F   | ACTCTCTTGTGTAATCCATGGGATC                                                                            | PCR for amplifying the upstream sequence of Chr I (1673871)     | 2-F  |
| RHY105-up-R   | CTTAGCGTGTGAATTTATTTAGCACCAACTTC<br>GTATAATGTACATTATACGAAGTTATATCGCTTA<br>TGTGTCCCATTATTTG           | PCR for amplifying the upstream sequence of Chr I (1673871)     |      |
| RHY105-down-F | GGTGCTAAATAAATTCACACGCTAAG                                                                           | PCR for amplifying the downstream sequence of Chr I (1673871)   |      |
| RHY105-down-R | ATGTATGGTGCGAATTTTATTCACC                                                                            | PCR for amplifying the downstream sequence of Chr I (1673871)   | 2-R  |
| RHY106F       | TCAAGGGTTAGGTTTGAATGGTA                                                                              | gRNA for LHZ901 CRISPR plasmid                                  |      |
| RHY106R       | AACTACCATTCAAACCTAACCCCT                                                                             | gRNA for LHZ901 CRISPR plasmid                                  |      |
| RHY106-up-F   | GCTTGGTCCAAGATTGACTTTAG                                                                              | PCR for amplifying the upstream sequence of Chr II (896924)     | 10-F |
| RHY106-up-R   | GAAGAGGGTTAGGTTTGAATGGTACATAACTTC<br>GTATAATGTACATTATACGAAGTTATGGGGGTA<br>TGTTCAAAGAACAAAAAT         | PCR for amplifying the upstream sequence of Chr II (896924)     |      |
| RHY106-down-F | GTACCATTCAAACCTAACCCCTCTTC                                                                           | PCR for amplifying the downstream sequence of Chr II (896924)   |      |
| RHY106-down-R | ATGATCGTGGTTTGAATCAATAC                                                                              | PCR for amplifying the downstream sequence of Chr II (896924)   | 10-R |
| RHY107F       | TCA GAATCATGGGCTTTTGTAA                                                                              | gRNA for LHZ902 CRISPR plasmid                                  |      |
| RHY107R       | AAC TTACAAAAAGCCCATGATTC                                                                             | gRNA for LHZ902 CRISPR plasmid                                  |      |
| RHY107-up-F   | ATTGACAAGGCAACTAGGTAAACACG                                                                           | PCR for amplifying the upstream sequence of Chr I (1451427)     | 9-F  |
| RHY107-up-R   | TAGGAAAATCATTAAATATCCTGCCATAACT<br>TCGTATAATGTACATTATACGAAGTTATCTTACA<br>AAAAGCCCATGATTCG            | PCR for amplifying the upstream sequence of Chr I (1451427)     |      |
| RHY107-down-F | GGCAGGATATTATTAATGATTTTCCTA                                                                          | PCR for amplifying the downstream sequence of Chr I (1451427)   |      |
| RHY107-down-R | GCGAAAGAAATTAACCAACAGAAAC                                                                            | PCR for amplifying the downstream sequence of Chr I (1451427)   | 9-R  |
| RHY108F       | TCA CCGATTCTCTCCCGCATCT                                                                              | gRNA for LHZ903 CRISPR plasmid                                  |      |
| RHY108R       | AAC AGATGCGGGGAGAGAATCGG                                                                             | gRNA for LHZ903 CRISPR plasmid                                  |      |
| RHY108-up-F   | ACTACTCGCACTCCACCATAATCC                                                                             | PCR for amplifying the upstream sequence of Chr III (326046)    | 11-F |
| RHY108-up-R   | TAAAAACGTTATTCTTTTAACAGAGCCATAACT<br>TCGTATAATGTACATTATACGAAGTTATGAGAT<br>GCGGGGAGAGAATCGG           | PCR for amplifying the upstream sequence of Chr III (326046)    |      |
| RHY108-down-F | GGCTCTGGTTAAAAGAATAACGTTTTTA                                                                         | PCR for amplifying the downstream sequence of Chr III (326046)  |      |
| RHY108-down-R | AGGTGTCTAGCAAAATGAACGAATC                                                                            | PCR for amplifying the downstream sequence of Chr III (326046)  | 11-R |
| RHY109F       | TCA GGTAATTATTTCTTTCTAC                                                                              | gRNA for LHZ904 CRISPR plasmid                                  |      |
| RHY109R       | AAC GTAGAAAGAAAATAATTACC                                                                             | gRNA for LHZ904 CRISPR plasmid                                  |      |
| RHY109-up-F   | GCTATTGTAGTTGGGGGAAGTGG                                                                              | PCR for amplifying the upstream sequence of Chr IV (704908)     | 12-F |
| RHY109-up-R   | TTTACAACCTATAAATATATCCATAACTTCGTA<br>TAATGTACATTATACGAAGTTATGGATATAGTTT<br>ATAGGTTGTAACCTCTTTC       | PCR for amplifying the upstream sequence of Chr IV (704908)     |      |
| RHY109-down-F | TGTAGAAAGAAAATAATTACCACTATTTATTTT                                                                    | PCR for amplifying the downstream sequence of Chr IV (704908)   |      |
| RHY109-down-R | CGACTCTCTGGTTTACAAGCTGAC                                                                             | PCR for amplifying the downstream sequence of Chr IV (704908)   | 12-R |
| RHY110F       | TCA GCACGGAGCAGATCTAGTTT                                                                             | gRNA for LHZ905 CRISPR plasmid                                  |      |
| RHY110R       | AAC AAAGTAGATCTGCTCCGTGC                                                                             | gRNA for LHZ905 CRISPR plasmid                                  |      |
| RHY110-up-F   | TCTTGATGAACAGATGGTATGTTGC                                                                            | PCR for amplifying the upstream sequence of Chr V (346042)      | 7-F  |
| RHY110-up-R   | GCAGAAGTCCTTATAATATATGTTGCCATAACTT<br>CGTATAATGTACATTATACGAAGTTATTAACCT<br>AGATCTGCTCCGTGCCAG        | PCR for amplifying the upstream sequence of Chr V (346042)      |      |
| RHY110-down-F | GGCAACATATATTATAAGGACTTCTGC                                                                          | PCR for amplifying the downstream sequence of Chr V (346042)    |      |
| RHY110-down-R | GGCAAGCGATATAAAAGAGATGA                                                                              | PCR for amplifying the downstream sequence of Chr V (346042)    | 7-R  |

|               |                                                                                                     |                                                                 |      |
|---------------|-----------------------------------------------------------------------------------------------------|-----------------------------------------------------------------|------|
| RHY111F       | TCA CTTTACTTATGATGATAGGA                                                                            | gRNA for LHZ906 CRISPR plasmid                                  |      |
| RHY111R       | AAC TCCTATCATCATAAGTAAAG                                                                            | gRNA for LHZ906 CRISPR plasmid                                  |      |
| RHY111-up-F   | ACTTGC GGATCTTCTCTGATGTATC                                                                          | PCR for amplifying the upstream sequence of Chr VI (1069906)    | 13-F |
| RHY111-up-R   | TGTTCTTTACTTATGATGATAGGAAATAACTTCG<br>TATAATGTACATTATACGAAGTTATGGACATTTT<br>TTTTAAGCCTTGATAGC       | PCR for amplifying the upstream sequence of Chr VI (1069906)    |      |
| RHY111-down-F | TTCCTATCATCATAAGTAAAGAACATTTTTTTC                                                                   | PCR for amplifying the downstream sequence of Chr VI (1069906)  |      |
| RHY111-down-R | AAGAAGAGCAGGAGGATCTGGAG                                                                             | PCR for amplifying the downstream sequence of Chr VI (1069906)  | 13-R |
| RHY112F       | TCA AGCATAAGTCGTGATATTCC                                                                            | gRNA for LHZ907 CRISPR plasmid                                  |      |
| RHY112R       | AAC GGAATATCACGACTTATGCT                                                                            | gRNA for LHZ907 CRISPR plasmid                                  |      |
| RHY112-up-F   | GGGCAAGCGAAGTGTTACTGAAG                                                                             | PCR for amplifying the upstream sequence of Chr III (1219332)   | 5-F  |
| RHY112-up-R   | TGGAATATCACGACTTATGCTGGT                                                                            | PCR for amplifying the upstream sequence of Chr III (1219332)   |      |
| RHY112-down-F | CCAGCATAAGTCGTGATATTCCAATAACTTCGT<br>ATAATGTACATTATACGAAGTTATGGCGAAATA<br>AACAACAACCTCCA            | PCR for amplifying the downstream sequence of Chr III (1219332) |      |
| RHY112-down-R | CTATATACTGGACGGATGCATGGAG                                                                           | PCR for amplifying the downstream sequence of Chr III (1219332) | 5-R  |
| RHY113F       | TCA TGAGAACCAGAAAGATTAGA                                                                            | gRNA for LHZ908 CRISPR plasmid                                  |      |
| RHY113R       | AAC TCTAATCTTTCTGGTTCTCA                                                                            | gRNA for LHZ908 CRISPR plasmid                                  |      |
| RHY113-up-F   | CTGGAAATACGTCTTGCAGTAAACA                                                                           | PCR for amplifying the upstream sequence of Chr IV (1172245)    | 8-F  |
| RHY113-up-R   | ATCACTCACTCAAATATCCCTAGCCATAACTTCG<br>TATAATGTACATTATACGAAGTTATTTCTAATCT<br>TTCTGGTTCTCACTTCG       | PCR for amplifying the upstream sequence of Chr IV (1172245)    |      |
| RHY113-down-F | GGCTAGGGATATTTGAGTGAGTGAT                                                                           | PCR for amplifying the downstream sequence of Chr IV (1172245)  |      |
| RHY113-down-R | CTGCTGAAAACCTTCAGAGCTTTATG                                                                          | PCR for amplifying the downstream sequence of Chr IV (1172245)  | 8-R  |
| RHY114F       | TCA GTCCGTCGCACTACTGTATG                                                                            | gRNA for LHZ909 CRISPR plasmid                                  |      |
| RHY114R       | AAC CACACAGTAGTGCGACGGAC                                                                            | gRNA for LHZ909 CRISPR plasmid                                  |      |
| RHY114-up-F   | GTTGTCTTCTAGTGTGACGTCGATG                                                                           | PCR for amplifying the upstream sequence of Chr V (756338)      | 16-F |
| RHY114-up-R   | GTTATTATTATGATTTGGGCAGTCCATAACTTC<br>GTATAATGTACATTATACGAAGTTATTCATACA<br>GTAGTGCGACGGACTCTTG       | PCR for amplifying the upstream sequence of Chr V (756338)      |      |
| RHY114-down-F | GGACTGCCCAAATACATAATAATAACA                                                                         | PCR for amplifying the downstream sequence of Chr V (756338)    |      |
| RHY114-down-R | ATTTCGCGTATTATTTGAGGATCTC                                                                           | PCR for amplifying the downstream sequence of Chr V (756338)    | 16-R |
| RHY115F       | TCA AAGGATGATAATAGTGCATT                                                                            | gRNA for LHZ910 CRISPR plasmid                                  |      |
| RHY115R       | AAC AATGCACTATTATCATCCTT                                                                            | gRNA for LHZ910 CRISPR plasmid                                  |      |
| RHY115-up-F   | TCTACAGCATACTCCCTATCTGCAG                                                                           | PCR for amplifying the upstream sequence of Chr VI (753935)     | 6-F  |
| RHY115-up-R   | TAATGCACTATTATCATCCTTAAATTCTAAT                                                                     | PCR for amplifying the upstream sequence of Chr VI (753935)     |      |
| RHY115-down-F | ATTTAAGGATGATAATAGTGCATTAATAACTTC<br>GTATAATGTACATTATACGAAGTTATGGCTACA<br>CTACAACCTACGACCTATC       | PCR for amplifying the downstream sequence of Chr VI (753935)   |      |
| RHY115-down-R | GAAATGGTTTATGAAATTTCCAAG                                                                            | PCR for amplifying the downstream sequence of Chr VI (753935)   | 6-R  |
| RHY116F       | TCA GATCTATTATTATAATTATG                                                                            | gRNA for LHZ911 CRISPR plasmid                                  |      |
| RHY116R       | AAC CATAATTATAATAATAGATC                                                                            | gRNA for LHZ911 CRISPR plasmid                                  |      |
| RHY116-up-F   | TTTCCAGAGGCATTATACGAAAAG                                                                            | PCR for amplifying the upstream sequence of Chr VII (689479)    | 14-F |
| RHY116-up-R   | TAATGATCTATTATTATAATTATGAATAACTTCG<br>TATAATGTACATTATACGAAGTTATGGCTTAAAT<br>TGTTTTCTCGTTATC         | PCR for amplifying the upstream sequence of Chr VII (689479)    |      |
| RHY116-down-F | TCATAATTATAATAATAGATCATTAATAAACTG<br>AC                                                             | PCR for amplifying the downstream sequence of Chr VII (689479)  |      |
| RHY116-down-R | AATTGGATGATATACCTCCTCACAG                                                                           | PCR for amplifying the downstream sequence of Chr VII (689479)  | 14-R |
| RHY117F       | TCA AGCGTATATAATTCTCGCTTC                                                                           | gRNA for LHZ912 CRISPR plasmid                                  |      |
| RHY117R       | AAC GAAGCGAGAAATATATACGCT                                                                           | gRNA for LHZ912 CRISPR plasmid                                  |      |
| RHY117-up-F   | ATGGTTGTTAAAGTTTTGAAGCAAAC                                                                          | PCR for amplifying the upstream sequence of Chr II (717538)     | 4-F  |
| RHY117-up-R   | GTGAGGAGGGTAGTGAGCTTTTCCATAACTTCG<br>TATAATGTACATTATACGAAGTTATAGAAGCGA<br>GAATATATACGCTTATAACTTTTAG | PCR for amplifying the upstream sequence of Chr II (717538)     |      |
| RHY117-down-F | GGAAAAGCTCACTACCTCCTCAC                                                                             | PCR for amplifying the downstream sequence of Chr II (717538)   |      |
| RHY117-down-R | CTGTACAGAGACATAGTAACCGGGATTC                                                                        | PCR for amplifying the downstream sequence of Chr II (717538)   | 4-R  |
| RHY118F       | TCA TGATTAAGACAGAAATGAT                                                                             | gRNA for LHZ913 CRISPR plasmid                                  |      |
| RHY118R       | AAC ATCATTTCTGTCTTTAATCA                                                                            | gRNA for LHZ913 CRISPR plasmid                                  |      |
| RHY118-up-F   | TCTTCAACTTATGTGCCACAAGATC                                                                           | PCR for amplifying the upstream sequence of Chr VIII (610289)   | 1-F  |

|               |                                                                                                 |                                                                 |     |
|---------------|-------------------------------------------------------------------------------------------------|-----------------------------------------------------------------|-----|
| RHY118-up-R   | TATAGGTTGTAATACGTTTCATGACTATAACTTCG<br>TATAATGTACATTATACGAAGTTATGGTTCAAA<br>AACTAATTTCTCAATTCAG | PCR for amplifying the upstream sequence of Chr VIII (610289)   |     |
| RHY118-down-F | AGTCATGAACGTATTACAACCTATATCC                                                                    | PCR for amplifying the downstream sequence of Chr VIII (610289) |     |
| RHY118-down-R | AGACTTCTTCTGGTAGAAACGGAAG                                                                       | PCR for amplifying the downstream sequence of Chr VIII (610289) | 1-R |

---
