# Supplementary material for: Establishment of a Cre-loxP System Based on a Leaky LAC4 Promoter and an Unstable panARS Element in Kluyveromyces marxianus
Source: MDPI journal article supplement (doi:10.3390/microorganisms10061240), 2022-06-17
Supplement: s1 [file s1]

# Supplementary file 5

LOCUS LHZ882 6702 bp DNA circular  
19-JUL-2021

## SOURCE

### ORGANISM

COMMENT This file is created by Vector NTI  
<http://www.invitrogen.com/>

COMMENT ORIGDB|GenBank

COMMENT VNTDATE|-12027597|

COMMENT VNTDBDATE|-13961859|

COMMENT LSOWNER|

COMMENT VNTNAME|LHZ882|

COMMENT VNTAUTHORNAME|Demo User|

COMMENT VNTOAUTHORNAME|Yao Yu|

## FEATURES Location/Qualifiers

terminator 2395..2584  
/vntifkey=""43""  
/label=ADH1\Terminator  
CDS complement(5375..6235)  
/vntifkey=""4""  
/label=Lactamase-AmpC  
promoter 2622..3000  
/vntifkey=""29""  
/label=TEF\Promoter  
CDS 3001..4029  
/vntifkey=""4""  
/label=HphMX4  
terminator 4030..4264  
/vntifkey=""43""  
/label=TEF\terminator  
promoter 922..2368  
/vntifkey=""30""  
/label=ADH1\promoter  
centromere 710..909  
/vntifkey=""5""  
/label=cen5  
CDS 25..703  
/vntifkey=""4""  
/label=kmARS1

BASE COUNT 1821 a 1509 c 1514 g 1858 t

## ORIGIN

1 gaacgcggcc gccagctgaa gcttatcgat tgaagtttg tccaactatc cactatggat  
61 atgcgttttg tgattaacc ttaaataaca cgtatttcgc attttccaaa agccttttt

121 cataactaca aactaactat tttgtttat ttacatcag taaattatgc gcagaaaata  
181 tgtaaggcta tatactcaat atagtggag agcctctggc tacttaatct gggttcatat  
241 attctgtcag tggatatga aatttaaata gtgaatttgg gcgcatgtag agagatcttt  
301 tgattaataa cccagtattt gattcttgaa tgttatttgc ctcttattaa gtatttcagt  
361 ttgatttata tttttgaaa gtaattgttg cttaccttc caaacaataa aaaaatataa  
421 aaaaatgtaa aaaatataat aaatattaaa taaaatacta cttgtttgaa aatcagagaa  
481 aatccaccaa aatatcaatc attcaagga ttccgaacc aagttcgaga tagtccttta  
541 aggtcagtaa aattcagttg cacgtataac agatattttt cattttgttc caatttaaaa  
601 gtccccatt tttaaatta ttgaaaataa aaattaaaaa attaaaagga atctctctat  
661 gtcactttaa aataaataaa ttgaaaatga tatatcgta aaaccgcggg tcacgtgtat  
721 acaaattatt aattttaaaa ctatataatt tattattttt ttattttgaa gtttagagta  
781 attttagtag tttttatat tttaaataaa tatgctttaa atttttactt aatattttat  
841 ttttttaaa tacaacgttt ttatttaaaa caaaattata agttaaaaag ttgtccgaa  
901 agtaaaatag gatccgtcga cgaagaaatg atggtaaag aaataggaaa tcaaggagca  
961 tgaaggcaaa agacaaatat aagggtcgaa cgaaaaataa agtgaagaat gttgatatga  
1021 tgtatttggc ttgcggcgc cgaaaaaacg agtttacgca attgcacaat catgctgact  
1081 ctgtggcgga cccgcgtct tggcgcccg gcgataacgc tggcggtgag gctgtgccg  
1141 gcggagtttt ttgcgctgc atttccaag gttaccctg cgtaagggg cgagattgga  
1201 gaagcaataa gaatgccggt tggggttgcg atgatgacga ccacgacaac tgggtcatt  
1261 atttaagtg ccgaaagaac ctgagtgcac ttgcaacatg agtatactag aagaatgagc  
1321 caagacttgc gagacgcgag ttgccggtg gtgcgaacaa tagagcgacc atgacctga  
1381 agtgagacg cgcataaccg ctgagtact ttgaagagga aacagcaata ggggtgctac  
1441 cagtataaat agacaggtac atacaacact ggaaatggtt gtctgttga gtacgttcc  
1501 aattcatttg ggtgtgcact ttattatgtt acaatatgga agggaaactt acacttccc  
1561 tatgcacata tattaattaa agtccaatgc tagtagagaa ggggggtaac acccctccg  
1621 gctctttcc gattttttc taaaccgtg aatatttcgg ataccctttt gttgtttccg  
1681 ggtgtacaat atggacttcc tctttctgg caaccaaacc catacatcg gattcctata  
1741 ataccctcgt tggctccct aacatgtagg tggcgaggag gagatataca atagaacaga  
1801 taccagacaa gacataatgg gtaaacaaag actacaccaa ttactgcc tcattgatg  
1861 tggtagataa cgaactaata ctgtagccct agacttgata gccatcatca tatcgaagt  
1921 tcaactacct tttccattt gccatctatt gaagtaataa taggcgcatg caactcttt  
1981 tctttttt tctttctct cccccggt gttgtctac catatccgca atgacaaaaa  
2041 aaatgatgga agacactaaa ggaaaaaatt aacgacaaag acagcaccaa cagatgtcgt  
2101 tgtccagag ctgatgagg gtatctcgaa gcacacgaaa cttttcctt cttcattca  
2161 cgcacactac tctaatga gcaacggtat acggcctcc ttccagttac ttgaattga  
2221 aataaaaaaa agtttgctgt cttgctatca agtataata gacctgcaat tattaatctt  
2281 ttgttctc gtcattgtc tgttccctt tcttctgtt ttcttttct gcacaatatt  
2341 tcaagctata ccaagcatac aatcaactcc cgggtagcgg taccggtact cgaggcgaat  
2401 ttctatgat ttatgattt tattattaaa taagtataa aaaaaataag tgtatacaaa  
2461 tttaaagtg actcttaggt tttaaacga aaattctat tcttgagtaa ctcttctgt  
2521 taggtcaggt tctttctca ggtatagat gaggtcgtc ttattgacca cacctctacc  
2581 ggcagatccg ctagggataa cagggtata tagatctgt tagcttgcct tgtccccgc  
2641 gggtcacccg gccagcgaca tggaggccca gaataccctc cttgacagtc ttgacgtgcg  
2701 cagctcagg gcagatgtg actgtcgcg gtacatttag ccatacatc ccatgtata

2761 atcatttgca tccatacatt ttgatggccg cacggcgcgga agcaaaaatt acggctctc  
2821 gctgcagacc tgcgagcagg gaaacgtcc cctcacagac gcgttgaatt gtccccacgc  
2881 cgcgccctg tagagaaata taaaaggta ggatttgcca ctgaggttct tcttcatat  
2941 acttcctttt aaaatcttgc taggatacag ttctcacatc acatccgaac ataaacaacc  
3001 atgggtaaaa agcctgaact caccgcgacg tctgtcgaga agtttctgat cgaaaagttc  
3061 gacagcgtct ccgacctgat gcagctctcg gagggcgaag aatctctgtc ttcagcttc  
3121 gatgtaggag ggcgtggata tgtctgcgg gtaaatact gcgccgatgg ttctacaaa  
3181 gatcggtatg ttatcgga ctttgcacg gccgcgtcc cgattccgga agtgcttgac  
3241 attggggaat tcagcgagag cctgacctat tgcattccc gccgtgcaca ggggtgcacg  
3301 ttgcaagacc tgcctgaaac cgaactgcc gctgttctgc agccggtcgc ggaggccatg  
3361 gatgcgatcg ctgcggccga tcttagccag acgagcgggt tcggcccat cggaccgcaa  
3421 ggaatcggtc aatacactac atggcgtgat tcatatgcg cgattgtga tccccatgtg  
3481 tatcactggc aaactgtgat ggacgacacc gtcagtgcgt ccgtcgcgca ggctctcat  
3541 gagctgatgc tttgggccga ggactgccc gaagtccggc acctctgca cgcggatttc  
3601 ggctccaaca atgtctgac ggacaatggc gcataacag cggtcattga ctggagcgag  
3661 gcgatgttcg gggattccca atacgaggtc gccaacatct tcttctggag gccgtggtg  
3721 gctttagtgg agcagcagac gcgctacttc gagcggaggc atccggagct tgcaggatcg  
3781 ccgcggctcc gggcgtatat gctccgcatt ggtcttgacc aactctatca gagcttggtt  
3841 gacggcaatt tcgatgatgc agcttggcg cagggtcgat gcgacgcaat cgccgaccc  
3901 ggagccggga ctgtcggcg tacacaaatc gccgcagaa gcgcggccgt ctggaccgat  
3961 ggctgtgtag aagtactgc cgatagtga aaccgacgcc ccagcactcg tccgagggca  
4021 aaggaataat cagtactgac aataaaaaga ttctgtttt caagaactg tcatgtgat  
4081 agtttttta tatttagtt gtctatattt aatcaaatgt tagcgtgatt tatattttt  
4141 ttcgctcga catcatctgc ccagatgcga agttaagtgc gcagaaagta atatcatgcg  
4201 tcaatcgtat gtgaatgctg gtcgtatc tgctgtcat tcgatactaa cgccgccatc  
4261 cagtgtcgaa aacgagctcg aattcatcga tgatatcaga tccactagt gcctatgcgg  
4321 ccgcggatct gccggtctcc ctatagtga tcgtattaat ttcgataagc caggtaacc  
4381 tgcattaatg aatcggccaa cgcgcgggga gaggcgggtt gcgtattggg cgctcttccg  
4441 cttctcgt cactgactcg ctgcgtcgg tcgttcggct gcggcgagcg gtatcagctc  
4501 actcaaaggc ggtaatacgg ttatccacag aatcagggga taacgcagga aagaacatgt  
4561 gagcaaaagg ccagcaaaag gccaggaacc gtaaaaaggc gcggttgctg gcgttttcc  
4621 ataggctccg cccctgac gagcatcaca aaaatcgacg ctcaagtcag aggtggcgaa  
4681 accgcagagg actataaaga taccaggcgt tccccctgg aagctccctc gtgcgtctc  
4741 ctgttcgac cctgccgtt accggatacc tgtccgctt tctccctcg ggaagcgtgg  
4801 cgcttttca atgctcacgc ttaggtatc tcagttcggg ttaggtcgtt cgctccaagc  
4861 tgggctgtg gcacgaacce cccgttcag ccgaccgtg cgcttatcc ggtaactatc  
4921 gtcttgagtc caaccggta agacacgact taccgact gccagcagcc actgtaaca  
4981 ggattagcag agcgaggtat gtaggcgggt ctacagagtt cttgaagtgg tggcctaact  
5041 acggctacac tagaaggaca gtatttgga tctgcgtct gctgaagcca gttacctcg  
5101 gaaaagagt tgtagctct tgatccgca acaaaaccac cgctggtagc ggtggtttt  
5161 ttgttgca gcagcagatt acgcgcagaa aaaaaggatc tcaagaagat ctttgatct  
5221 ttctacggg gtctgacgt cagtgaacg aaaactcacg ttaagggtt ttggtcatga  
5281 gattatcaa aaggatctt acctagatcc tttaaatta aaaatgaagt tttaaataa  
5341 tctaaagtat atatagtaa acttggtctg acagttacca atgcttaac agtgaggcac

5401 ctatctcagc gatctgtcta ttctgttcac ccatagttgc ctgactcccc gtcgtgtaga  
5461 taactacgat acgggagggc ttaccatctg gccccagtgc tgcaatgata ccgcgagacc  
5521 cacgctcacc ggctccagat ttatcagcaa taaaccagcc agccggaagg gccgagcgca  
5581 gaagtgggcc tgcaacttta tccgcctcca tccagtctat taattgtgc cgggaagcta  
5641 gagtaagtag ttcgccagtt aatagtttgc gcaacgttgc tgccattgct acaggcatcg  
5701 tgggtgcacg ctgctcggtt ggtatggctt cattcagctc cgggtcccaa cgtcaaggc  
5761 gaggtaacatg atccccatg ttgtgcaaaa aagcggtag ctcttcggt cctccgatcg  
5821 ttgtcagaag taagtggcc gcagtgttat cactcatggt tatggcagca ctgcataatt  
5881 ctcttactgt catgccatcc gtaagatgct ttctgtgac tggtagtac tcaaccaagt  
5941 cattctgaga atagtgtatg cggcgaccga gttgctcttg cccggcgta atacgggata  
6001 ataccgcgcc acatagcaga actttaaag tgctcatcat tggaaaacgt tcttcggggc  
6061 gaaaactctc aaggatctta ccgctgttga gatccagttc gatgtaacc actcgtgcac  
6121 ccaactgac ttcagcatct ttactttca ccagcgttc tgggtgagca aaaacaggaa  
6181 ggcaaatgc cgcaaaaaag ggaataaggc cgacacggaa atgtgaata ctcatctct  
6241 tctttttca atattattga agcatttacc aggggtattg tctcatgagc ggatacatat  
6301 ttgaatgtat ttagaaaaat aaacaaatag ggggtccgcg cacatttccc cgaaaagtgc  
6361 cacctgacgt ctaagaaacc attattatca tgacattaac ctataaaaat aggcgtatca  
6421 cgaggccctt tcgtctcgcg cgttcgggtg atgacgggtga aaacctctga cacatgcage  
6481 tcccgagac ggtcacagct tgtctgtaag cggatgccgg gagcagacaa gcccgtcagg  
6541 gcgcgtcagc ggggtgtggc ggggtgcggg gctggcttaa ctatcgggca tcagagcaga  
6601 ttgtactgag agtgcacat atggacatat tgcgttaga acgcggctac aattaataca  
6661 taaccttatg tatcatacac atacgattta ggtgacacta ta

//
