# Supplementary material for: Establishment of a Cre-loxP System Based on a Leaky LAC4 Promoter and an Unstable panARS Element in Kluyveromyces marxianus
Source: MDPI journal article supplement (doi:10.3390/microorganisms10061240), 2022-06-17
Supplement: s1 [file s1]

# Supplementary file 4

LOCUS LHZ881 6496 bp DNA circular

30-NOV-2021

SOURCE

ORGANISM

COMMENT This file is created by Vector NTI  
http://www.invitrogen.com/

COMMENT ORIGDB|GenBank

COMMENT VNTDATE|-12027597|

COMMENT VNTDBDATE|-14155143|

COMMENT LSOWNER|

COMMENT VNTNAME|LHZ881|

COMMENT VNTAUTHORNAME|Demo User|

COMMENT VNTOAUTHORNAME|Yao Yu|

FEATURES Location/Qualifiers

terminator 2189..2378  
/vntifkey=""43""  
/label=ADH1\Terminator  
CDS complement(5169..6029)  
/vntifkey=""4""  
/label=Lactamase-AmpC  
promoter 2416..2794  
/vntifkey=""29""  
/label=TEF\Promoter  
CDS 2795..3823  
/vntifkey=""4""  
/label=HphMX4  
terminator 3824..4058  
/vntifkey=""43""  
/label=TEF\terminator  
promoter 716..2162  
/vntifkey=""30""  
/label=ADH1\promoter  
CDS 25..703  
/vntifkey=""4""  
/label=kmARS1

BASE COUNT 1742 a 1496 c 1496 g 1762 t

ORIGIN

1 gaacgcggcc gccagctgaa gcttatcgat tgaagtttg tccaactatc cactatggat  
61 atgcgttttg tgattaacc ttaaataaca cgtatttcgc attttccaaa agccttttt  
121 cataactaca aactaactat tttgtttat ttacatcag taaattatgc gcagaaaata  
181 tgtaaggcta tatactcaat atagtggaag agcctctggc tacttaatct gggttcatat  
241 attctgtcag tggatatagta aatttaaata gtgaatttgg gcgcatgtag agagatcttt

301 tgattaataa cccagtattt gattcttgaa tgttattgt ctctattaa gtattcagt  
361 ttgatttata tttttgaaa gtaattgtg ctttacctc caacaataa aaaaataaa  
421 aaaaatgtaa aaaatataat aaattataa taaaacta ctgtttgaa aatcagagaa  
481 aatccaccaa aatatcaatc attcaagga tttccgaacc aagttcgaga tagtcctta  
541 aggtcagtaa aattcagttg cacgtataac agatatttt cattttgtc caatttaaa  
601 gtccccatt tttaaatta ttgaaaataa aaattaaaaa attaaaagga atctcttat  
661 gtcactttaa aataaataa ttgaaaatga tatatcgta aaaccgcggg tcgacgaaga  
721 aatgatggta aatgaaatag gaaatcaagg agcatgaagg caaaagacaa atataagggt  
781 cgaacgaaaa ataaagtga aagtgtgat atgatgtatt tggctttgcg gcgccgaaaa  
841 aacgagttta cgcaattgca caatcatgct gactctgtgg cggaccgcg ctcttgcgg  
901 cccggcgata acgctgggag tgaggctgtg cccggcgag tttttgcgc ctgcatttc  
961 caaggtttac cctgcgctaa ggggcgagat tggagaagca ataagaatgc cggtgggggt  
1021 tgcgatgatg acgaccacga caactggtgt cattattaa gttgccgaaa gaacctgagt  
1081 gcatttgcaa catgagtata ctagaagaat gagccaagac ttgcgagacg cgagtttgc  
1141 ggtggtgca acaatagagc gaccatgacc ttgaaggtga gacgcgata accgctagag  
1201 tactttgaag aggaaacagc aatagggttg ctaccagtat aaatagacag gtacatacaa  
1261 cactggaaat ggtgtctgt ttgagtacgc ttcaattca tttgggtgtg cactttatta  
1321 tgttacaata tggaaggga ctttacactt ctctatgca catatattaa ttaaagteca  
1381 atgctagtag agaagggggg taacaccct ccgcgtctt ttcgatttt ttctaaacc  
1441 gtggaatatt tcggatatcc tttgttgtt tccgggtga caatatggac ttctctttt  
1501 ctggcaacca aaccataca tcgggattcc tataatacct tcgttggtct cctaacatg  
1561 taggtggcgg aggggagata tacaatagaa cagataccag acaagacata atgggtaaa  
1621 caagactaca ccaattacac tgcctcattg atggtggtac ataacgaact aatagttag  
1681 ccctagactt gatagccatc atcatatga agtttacta cccttttcc atttgccatc  
1741 tattgaagta ataataggcg catgcaactt ctttctttt ttttctttt ctctctccc  
1801 cgttgtgtc tcaccatate cgcaatgaca aaaaaatga tggaagacac taaaggaaaa  
1861 aattaacgac aaagacagca ccaacagatg tcgttgttcc agagctgatg aggggtatct  
1921 cgaagcacac gaaactttt ccttccttca ttacgcaca ctactctta atgagcaacg  
1981 gtatcggcc ttcttccag ttacttgaat ttgaaataa aaaaagttt ctgtctgtc  
2041 atcaagtata aatagacctg caattattaa tctttgttt cctcgtcatt gttctgttc  
2101 cctttcttcc ttgtttttt ttctgcacaa tatttcaagc tataccaagc atacaatcaa  
2161 ctcccgggta gcggtaccgg tactcgaggc gaatttctta tgatttatga ttttattat  
2221 taaataagtt ataaaaaaaa taagtgtata caaattttta agtgactctt aggttttaaa  
2281 acgaaaatc ttattctga gtaactctt cctgtaggtc aggttgctt ctacgtata  
2341 gtatgaggtc gctcttattg accacacctc taccggcaga tccgtaggg ataacagggt  
2401 aatatagatc tgtttagctt gccttgccc cgccgggtca cccggccagc gacatggagg  
2461 ccagaatac cctcctgac agtcttgac tgcgcagctc aggggcatga tgtactgtc  
2521 gccgtacat ttagcccata catcccatg tataatcatt tgcaccata cattttgatg  
2581 gccgcacggc gcgaagcaaa aattacggct cctcgtgca gacctgcag cagggaacg  
2641 ctcccctcac agacgcgtg aattgtccc acgccgcgc cctgtagaga aatataaaag  
2701 gttaggattt gccactgagg ttcttcttc atatacttc ttttaaaatc ttgctaggat  
2761 acagttctca catcacatc gaacataaac aacctgggt aaaaagcctg aactaccgc  
2821 gacgtctgtc gagaagttc tgatgaaaa gttcgacagc gtcccgacc tgatgcagct  
2881 ctccggaggc gaagaatctc gtgcttcag ctccgatga ggaggcggtg gatatgtct

2941 gcgggtaa at agctgcgcg atggtttcta caaagatcgt tatgtttatc ggcactttgc  
3001 atcggccgcg ctcccgattc cggaagtgtc tgacattggg gaattcagcg agagcctgac  
3061 ctattgcac tcccgcctg cacagggtgt cacgttgcaa gacctgcctg aaaccgaact  
3121 gcccgtgtt ctgcagccgg tcgcggagcg catggatgcg atcgtgcgg ccgatcttag  
3181 ccagacgagc gggttcggcc cattcggacc gcaaggaatc ggtcaataca ctacatggcg  
3241 tgattcata tgcgcgattg ctgatcccca tgtgtatcac tggcaaactg tgatggacga  
3301 caccgtcagt gcgtccgtcg cgcaggtctc cgatgagctg atgctttggg ccgaggactg  
3361 ccccgaagtc cggcacctcg tgcacgcgga ttccggctcc aacaatgtcc tgacggacaa  
3421 tgccgcata acagcggta ttgactggag cgaggcgatg ttgggggatt cccaatacga  
3481 ggtgcgcaac atcttcttct ggaggccgtg gttggcttgt atggagcagc agacgcgcta  
3541 cttcagcgg aggcattccg agcttgcagg atcgcgcgg ctccgggctg atatgctccg  
3601 cattggtctt gaccaactct atcagagctt ggttgacggc aatttcgatg atgcagctt  
3661 ggcgcagggt cgatgcgac caatcgctcg atccggagcc gggactgtcg ggcgtacaca  
3721 aatgcgccgc agaagcgcgg ccgtctggac cgatggctgt gtagaagtac tcgccgatag  
3781 tggaaaccga cgcgccagca ctgctccgag ggcaaaggaa taatcagtac tgacaataaa  
3841 aagattcttg tttcaagaa ctgtcattt gtatagttt ttatattgt agttgttcta  
3901 ttttaataca atgttagcgt gatttatatt ttttccgc tcgacatcat ctgccagat  
3961 gcgaagttaa gtgcgcagaa agtaatatca tgcgtcaatc gtatgtgaat gctggctcgt  
4021 atactgctgt cgattcgata ctaacgccgc catccagtgt cgaacacgag ctgcaattca  
4081 tcgatgatat cagatccact agtggcctat gcggccgcgg atctgccggt ctccctatag  
4141 tgagtcgtat taatttcgat aagccagggt aacctgcatt aatgaatcgg ccaacgcgcg  
4201 gggagaggcg gtttgcgtat tggcgctct tccgttctc cgctactga ctgctgcgc  
4261 tcggtcgttc ggctgcggcg agcggatatca gctcactcaa aggcggtaat acggttatcc  
4321 acagaatcag gggataacgc aggaagaac atgtgagcaa aaggccagca aaaggccagg  
4381 aaccgtaaaa aggcgcggtt gctggcggtt ttccataggc tccgcccc tgacgagcat  
4441 caaaaaatc gacgtcaag tcagagggtg cgaacccga caggactata aagataccag  
4501 gcgtttccc ctggaagtc cctcgtgcgc tctctgttc cgacctgcc gttaccgga  
4561 tacctgtccg ctttctccc ttccgggaagc gtggcgctt ctcaatgctc acgtgtagg  
4621 tatctcagtt cgggtgaggt cgctcgtcc aagctgggt gtgtgcacga acccccgtt  
4681 cagcccgacc gctgcgcctt atccggtaac tctcgttct agtccaacc ggtaagacac  
4741 gacttatcgc cactggcagc agccactggt aacaggatta gcagagcgag gtatgtaggc  
4801 ggtgctacag agttctgaa gtggtggcct aactacggct aactagaag gacagtatt  
4861 ggtatctgcg ctctctgaa gccagttacc ttccgaaaaa gagttggtag ctcttgatcc  
4921 ggcaaaaaa ccaccgtgg tagcgggtgt tttttgtt gcaagcagca gattacgcg  
4981 agaaaaaag gatctcaaga agatccttg atctttcta cggggtctga cgctcagtg  
5041 aacgaaaact caggttaagg gattttggtc atgagattat caaaaaggat cttcacctag  
5101 atccttttaa attaaaaatg aagttttaa tcaatctaaa gtatatatga gtaaacctgg  
5161 tctgacagtt accaatgctt aatcagtgag gcacctatc cagcagctg tctatttctg  
5221 tcacccatag ttgctgact cccgctcgt tagataacta cgatacggga gggcttacca  
5281 tctggcccca gtgctgcaat gataccgca gaccacgct caccggctcc agatttatca  
5341 gcaataaacc agccagccgg aaggcccgag cgcagaagtg gtctgcaac ttatccgcc  
5401 tccatccagt ctattaattg ttgccgggaa gctagagtaa gtagttcgc agttaatagt  
5461 ttgcgcaacg ttgttccat tgctacaggc atcgtggtgt cagctcgtc gtttggtatg  
5521 gttcattca gctccggtc ccaacgatca aggcgagtta catgatcccc catgttgtgc

5581 aaaaaagcgg ttagctcctt cggctctccg atcggtgtca gaagtaagtt ggccgcagtg  
5641 ttactactca tggttatggc agcactgcat aattctctta ctgtcatgcc atccgtaaga  
5701 tgcttttctg tgactgggtga gtactcaacc aagtcattct gagaatagtg tatgcggcga  
5761 ccgagttgct cttgcccggc gtcaatacgg gataataccg cgccacatag cagaacttta  
5821 aaagtgtcga tcattggaaa acgttcttcg gggcgaaaac tctcaaggat cttaccgctg  
5881 ttgagatcca gttcgatgta acccactcgt gcacccaact gatcttcage atcttttact  
5941 ttcaccagcg tttctgggtg agcaaaaaca ggaaggcaaa atgccgcaaa aaaggggaata  
6001 agggcgacac ggaaatgttg aatactcata ctcttccttt ttcaatatta ttgaagcatt  
6061 tatcagggtt attgtctcat gacgggatac atatttgaat gtatttagaa aaataaaca  
6121 ataggggttc cgcgcacatt tccccgaaaa gtgccacctg acgtctaaga aaccattatt  
6181 atcatgacat taacctataa aaataggcgt atcacgaggc ctttcgtct cgcgcgttc  
6241 ggtgatgacg gtgaaaacct ctgacacatg cagctcccgg agacggtcac agcttgtctg  
6301 taagcggatg ccgggagcag acaagcccgt cagggcgcgt cagcgggtgt tggcgggtgt  
6361 cggggctggc ttaactatgc ggcatcagag cagattgtac tgagagtga ccatatggac  
6421 atattgtcgt tagaacgcgg ctacaattaa tacataacct tatgtatcat acacatacga  
6481 tttaggtgac actata

//
